# Supplementary material for: Divergent profiles of rhizosphere soil carbon and nitrogen cycling in Pinus massoniana provenances with different types of carbon storage
Source: Frontiers journal article supplement (doi:10.3389/fmicb.2025.1537173), 2025-03-17
Supplement: Data_Sheet_2.xlsx [file Data_Sheet_2.xlsx]

## Sheet: Table S2
Table S2 Information of microbial functional genes involved in the C and N cycling processes identified in this study.
Pathway and related metabolism process			Gene	EC name
Nitrogen cycle	Nitrogen degradation		gdhA	glucose 1-dehydrogenase
			ureA	urease subunit gamma
			ureB	urease subunit beta
			ureC	urease subunit alpha
	Nitrification		amoA	alkene monooxygenase alpha subunit
			amoB	methane/ammonia monooxygenase subunit B
			amoC	alkene monooxygenase ferredoxin subunit
			hao	hydroxylamine dehydrogenase
	Denitrification		norB	nitric oxide reductase subunit B
			norC	nitric oxide reductase subunit C
			nosZ	nitrous-oxide reductase
			nosD	nitrous oxidase accessory protein
			narG	nitrate reductase / nitrite oxidoreductase, alpha subunit
			narH	nitrate reductase / nitrite oxidoreductase, beta subunit
			narI,narV	nitrate reductase gamma subunit
			nirK	nitrite reductase (NO-forming)
			nirS	nitrite reductase (NO-forming) / hydroxylamine reductase
	Nitrogen fixation		nifD	nitrogenase molybdenum-iron protein alpha chain
			nifH	nitrogenase iron protein NifH
			nifK	nitrogenase molybdenum-iron protein beta chain
	Assimilatory nitrate reduction (ANRA)		nrfA	nitrite reductase (cytochrome c-552)
			nrfH	cytochrome c nitrite reductase small subunit
			nirB	nitrite reductase (NADH) large subunit
			nirD	nitrite reductase (NADH) small subunit
			napA	nitrate reductase (cytochrome)
			napB	nitrate reductase (cytochrome), electron transfer subunit
			napC	cytochrome c-type protein NapC
	Dissimilatory nitrate reduction (DNRA)		nirA	ferredoxin-nitrite reductase
			narB	ferredoxin-nitrate reductase
			nasA	assimilatory nitrate reductase catalytic subunit
			nasB	assimilatory nitrate reductase electron transfer subunit
Carbon cycle	Methanogeneiss		mtrA	tetrahydromethanopterin S-methyltransferase subunit A
			mtrB	transcription attenuation protein (tryptophan RNA-binding attenuator protein)
	Methane oxidation		pmoA	methane/ammonia monooxygenase subunit A
			pmoB	methane/ammonia monooxygenase subunit B
			pmoC	methane/ammonia monooxygenase subunit C
	Carbon-monoxide oxidation		coxL	aerobic carbon-monoxide dehydrogenase large subunit
			coxM	aerobic carbon-monoxide dehydrogenase medium subunit
			coxS	aerobic carbon-monoxide dehydrogenase small subunit
	Calvin cycle		cbbL	ribulose-bisphosphate carboxylase large chain
			cbbR	LysR family transcriptional regulator, low CO2-responsive transcriptional regulator
			cbbS	ribulose-bisphosphate carboxylase small chain
	Reductive acetyl-CoA pathway		cooC	CO dehydrogenase maturation factor
			cooS	anaerobic carbon-monoxide dehydrogenase catalytic subunit
			fdhA	glutathione-independent formaldehyde dehydrogenase
			fhs	formate--tetrahydrofolate ligase
	rTCA cycle		korA	2-oxoglutarate/2-oxoacid ferredoxin oxidoreductase subunit alpha
			korB	2-oxoglutarate/2-oxoacid ferredoxin oxidoreductase subunit beta
			korC	2-oxoglutarate ferredoxin oxidoreductase subunit gamma
			korD	2-oxoglutarate ferredoxin oxidoreductase subunit delta
			icd	isocitrate dehydrogenase
	Multiple systems		pccA	propionyl-CoA carboxylase alpha chain
			accA	aminoglycoside 6'-N-acetyltransferase
			accB	acetyl-CoA carboxylase biotin carboxyl carrier protein
			accD	acetyl-CoA carboxylase carboxyl transferase subunit beta
	Carbon degration	Hemicellulose	xylA	xylose isomerase
			xylF	D-xylose transport system substrate-binding protein
			xylH	D-xylose transport system permease protein
			xylB	xylulokinase
			xylE	MFS transporter, SP family, xylose:H+ symportor
			rfbB	dTDP-glucose 4,6-dehydratase
		Chitin	chi	bifunctional chitinase/lysozyme
		Cellulose	celB	cellobiose PTS system EIIC component
			cbhA	cellulose 1,4-beta-cellobiosidase
			bcsA	cellulose synthase (UDP-forming)
		Pectin	pgl	6-phosphogluconolactonase
			pel	pectate lyase
		Lignin	GAOA	galactose oxidase
			E1.10.3.1	polyphenol oxidase
		Starch	malZ	alpha-glucosidase
			malQ	4-alpha-glucanotransferase
			trex	isoamylase

## Sheet: Table S3
Table S3 Results of Mantel tests between carbon and nitrogen cycling genes composition with environmental factors across all treatment, values at p<0.05 are shown in bold.
C cycling genes	Mantel’s r
	Methanogeneiss	Methane oxidation	Carbon monoxide oxidation	Calvin cycle	Reductive acetyl CoA pathway	rTCA cycle	Multiple systems	Carbon degration
SOC	0.175	-0.0187	0.590**	-0.0798	-0.0579	0.195	0.0202	0.273*
TN	0.0926	0.0055	0.510**	0.0001	0.0176	0.224	0.2	0.296*
pH	0.596***	0.018	0.215	-0.146	-0.102	0.0546	0.127	0.602 ***
NH4+-N	0.0537	0.0483	-0.111	0.0301	0.0652	0.115	0.0242	0.193
NO3--N	0.188	-0.0033	0.524**	-0.0557	-0.0076	0.255	0.275*	0.578***
NiR	0.0674	-0.0399	0.329	-0.206	-0.204	-0.0323	0.066	-0.0266
UR	-0.156	0.145	-0.188	-0.213	-0.191	-0.275	-0.327	-0.158
PPO	-0.038	-0.0639	0.215	-0.147	-0.15	-0.189	-0.0513	-0.229
POD	0.0265	-0.187	-0.133	0.0426	0.0554	-0.0155	-0.0922	0.0596
N cycling genes	Mantel’s r
	Nitrogen degradation	Nitrification	Denitrification	Nitrogen frixation	Assimilatory nitrate reduction	Dissimilatory nitrate reduction
SOC	0.006	-0.0119	0.431**	0.249*	0.248*	0.317**
TN	0.016	0.0011	0.431**	0.293	0.291*	0.328*
pH	0.219	0.0318	0.255*	-0.0285	0.094	0.138
NH4+-N	0.09	0.0134	-0.102	0.173	0.0985	-0.046
NO3--N	0.111	0.0173	0.526**	0.365*	0.443*	0.462**
NiR	-0.136	-0.058	0.188	0.204	0.128	0.188
UR	0.114	0.0446	-0.194	0.1	-0.103	-0.153
PPO	0.0095	-0.109	-0.071	-0.089	-0.175	-0.107
POD	-0.0455	-0.161	-0.0664	-0.281	-0.188	-0.214
*0.01 < P ≤ 0.05, **0.001< P ≤ 0.01; ***P ≤ 0.001.
